# Supplementary material for: Vaccines and vaccination in prison settings: availability and model of service delivery in 20 European countries
Source: PubMed Central journal article supplement — BMC Public Health. 2024 Oct 5;24:2716. doi: 10.1186/s12889-024-20207-3 (PMC11452945; doi:10.1186/s12889-024-20207-3), 2024-10-05
Supplement: 12889_2024_20207_MOESM1_ESM.pdf [file 12889_2024_20207_MOESM1_ESM.pdf]

“Reaching the hard-to-reach: increasing access and vaccine uptake among the prison population in Europe” – known as RISE-Vac – is an international project funded by the EU aiming to raise vaccination levels in prisons throughout Europe. The project, officially launched in May 2021, is set to spend the next three years working to reduce the number of deaths and levels of illness in prisons caused by those infectious diseases that are vaccine preventable.

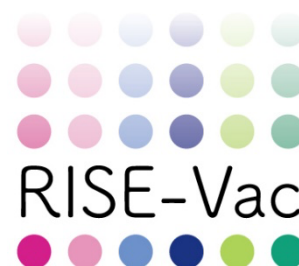

The present questionnaire has three different sections: while the first and the second sections are related to vaccination among people living in prison (PLPs) and prison staff members in your country, respectively; the last section is related to vaccination in your prison.

Country:

Name of Respondent:

E-mail:

Data of Completion:

**SECTION I: Vaccination among people living in prison (PLPs) in your country.**

1. Do you have national/subnational guidelines to implement vaccination in prisons in your country?

- Yes
- No
- I don't know

2. If yes, the year of the last update: \_\_\_\_\_

3. Which of the following vaccines are offered in prison in your country?

|                                        | Yes | No | Everyone | Specific age groups | High Risk Groups | People with comorbidities |
|----------------------------------------|-----|----|----------|---------------------|------------------|---------------------------|
| Hepatitis B (HBV)                      |     |    |          |                     |                  |                           |
| Hepatitis A (HAV)                      |     |    |          |                     |                  |                           |
| Seasonal Influenza (Flu)               |     |    |          |                     |                  |                           |
| Human Papillomavirus (HPV)             |     |    |          |                     |                  |                           |
| Diphtheria - Tetanus - Pertussis (DTP) |     |    |          |                     |                  |                           |
| Measles – Mumps – Rubella (MMR)        |     |    |          |                     |                  |                           |

|                          |  |  |  |  |  |  |
|--------------------------|--|--|--|--|--|--|
| Pneumococcal             |  |  |  |  |  |  |
| Shingles (Herpes Zoster) |  |  |  |  |  |  |
| COVID-19                 |  |  |  |  |  |  |
| Monkeypox                |  |  |  |  |  |  |
| Meningococcal            |  |  |  |  |  |  |

Other (please specify) \_\_\_\_\_

4. For the vaccines listed above, when is the 1<sup>st</sup> dose/only dose offered?

- Within one week from prison entrance
- Between a week and a month from prison entrance
- After a month from prison entrance

5. How is vaccination offered in your prison?

- Actively by the healthcare workers
- On request by the people living in prison

6. For the vaccines identified in Q3, is there a follow-up after release from prison?

- Yes
- No

7. Who is implementing the vaccination programs in prisons in your country? Please tick all applicable answers.

- Healthcare staff
- Custodial Staff
- NGOs
- Healthcare system of the community
- Other (please specify) \_\_\_\_\_

8. What are the infrastructural barriers towards implementing vaccination in prisons in your country? Please tick all applicable answers.

- Lack of budget
- Lack of human resources
- Vaccine shortage
- Lack of equipment to store vaccines (e.g., transporter or refrigerator)
- Other (please specify) \_\_\_\_\_

9. What are the main barriers to vaccine uptake among PLPs in your country? Please tick all applicable answers.

- Lack of knowledge/Misinformation
- Conspiracy Theory/Misbeliefs
- Distrust in prison authorities
- Vaccines are not free of charge
- Other (please specify) \_\_\_\_\_

10. Which strategies and interventions are implemented in prisons in your country to deal with these barriers? Please tick all applicable answers.

- Knowledge dissemination through workshops, posters, pamphlets, etc.
- Peer-education
- Question/Answer sessions with experts
- Active recommendation of vaccines/Opt-out programs
- There are no strategies/Interventions available in our prisons
- Other (please specify) \_\_\_\_\_

11. Do you have an immunization information system (IIS) available in prisons in your country? If YES, how is the structure of the IIS in prisons in your country?

- Paper-based
- Digital
- Mixed
- I don't know
- Not Available

**SECTION II - Vaccination among prison staff members in your country.**

12. Is the vaccination status of prison staff members in your country checked before employment?

- Yes, only healthcare staff
- Yes, healthcare and custodial staff
- No
- I don't know

13. Is the vaccination status of prison staff members in your country checked regularly after employment?

- Yes, only healthcare staff
- Yes, healthcare and custodial staff
- No
- I don't know

14. Which of the following vaccine-preventable diseases are checked regularly among prison staff members in your country? Please leave blank if there is no routine evaluation in your country, otherwise please tick all applicable answers.

- Pneumonia
- Varicella Zoster/Varicella
- MMR (Measles Mumps Rubella)
- HBV (Hepatitis B)
- DTP (Diphtheria Tetanus Pertussis)
- Influenza/COVID-19
- Other (please specify) \_\_\_\_\_

15. What are the main barriers towards vaccine uptake among staff members in your country? Please tick all applicable answers.

- Lack of knowledge/Misinformation
- Conspiracy Theory/Misbeliefs
- Vaccines are not free of charge
- Other (please specify) \_\_\_\_\_

16. Which strategies and interventions are implemented in prisons in your country to deal with these barriers? Please tick all applicable answers.

- Knowledge dissemination through workshops, posters, pamphlets, etc.
- Peer-education
- Question/Answer sessions with experts
- Active recommendation of vaccines/ Opt-out programs
- Other (please specify) \_\_\_\_\_

**SECTION III: Vaccination in your prison.**

Below are questions about which vaccines are usually offered in your structure.

17. Does your facility provide vaccination services?

- Yes
- No

If YES, which vaccination/s are offered to PLPs?

Please answer "Yes" or "No" for each of the following vaccines.

| Typology                                                                     | Vaccine                                     | Yes | No |
|------------------------------------------------------------------------------|---------------------------------------------|-----|----|
| Seasonal vaccinations and vaccinations during outbreak                       | Seasonal Influenza (Flu)                    |     |    |
|                                                                              | COVID-19                                    |     |    |
| Childhood life-course vaccinations, booster doses                            | Diphtheria - Tetanus – Pertussis (DTP)      |     |    |
|                                                                              | Measles – Mumps - Rubella (MMR)             |     |    |
|                                                                              | Meningococcal                               |     |    |
|                                                                              | Hepatitis A (HAV)                           |     |    |
| Cancer preventable vaccination                                               | Hepatitis B (HBV)                           |     |    |
|                                                                              | Human Papillomavirus (HPV)                  |     |    |
| Over 65 vaccinations and people with chronic conditions – fragile population | Pneumococcal                                |     |    |
|                                                                              | <i>Haemophilus influenzae</i> type b (HemB) |     |    |
|                                                                              | Shingles (Herpes Zoster)                    |     |    |
